# Supplementary material for: Studying primate cognition in a social setting to improve validity and welfare: a literature review highlighting successful approaches
Source: PeerJ journal article supplement (doi:10.7717/peerj.3649), 2017-08-03
Supplement: Table_S1_R2_landscape.pdf [file Table_S1_R2_landscape.pdf]

Table S1. The publications that tested primate cognition in a social setting published between 2000 and 2015 (inclusive), with one entry per unique combination of environment type and species per publication.

| Species                      | Reference                      | Title of Article                                                                                                                                                                                             | Environment Type | Number of Groups Tested | Number of Individuals Tested |
|------------------------------|--------------------------------|--------------------------------------------------------------------------------------------------------------------------------------------------------------------------------------------------------------|------------------|-------------------------|------------------------------|
| <i>Alouatta caraya</i>       | da Cunha et al., 2006          | Roars of black howler monkeys ( <i>Alouatta caraya</i> ): evidence for a function in inter-group spacing                                                                                                     | field            | 1                       | 13                           |
| <i>Alouatta pigra</i>        | Briseno-Jamarillo et al., 2015 | Individual voice recognition and an auditory map of neighbours in free-ranging black howler monkeys ( <i>Alouatta pigra</i> )                                                                                | field            | 6                       | 45                           |
| <i>Alouatta pigra</i>        | Kitchen et al., 2004           | Subordinate male black howler monkey ( <i>Alouatta pigra</i> ) responses to loud calls: experimental evidence for the effects of intra-group male relationships and age                                      | sanctuary        | NA                      | 10                           |
| <i>Alouatta pigra</i>        | Kitchen, 2004                  | Alpha male black howler monkey responses to loud calls: effect of numeric odds, male companion behavior and reproductive investment                                                                          | sanctuary        | NA                      | 12                           |
| <i>Alouatta pigra</i>        | Kitchen, 2006                  | Experimental test of female black howler monkey ( <i>Alouatta pigra</i> ) responses to loud calls from potentially infanticidal males: effects of numeric odds, vulnerable offspring, and companion behavior | sanctuary        | 12                      | 27                           |
| <i>Aotus nigriceps</i>       | Bicca-Marques & Garber, 2004   | Use of spatial, visual, and olfactory information during foraging in wild nocturnal and diurnal anthropoids: A field experiment comparing <i>Aotus</i> , <i>Callicebus</i> , and <i>Saguinus</i>             | field            | 1                       | 4                            |
| <i>Ateles fusciceps</i>      | Nelson & Boevig, 2015          | Precise digit use increases the expression of handedness in Colombian spider monkeys ( <i>Ateles fusciceps rufiventris</i> )                                                                                 | zoo              | 1                       | 9                            |
| <i>Ateles fusciceps</i>      | Nelson et al., 2015            | Evaluating handedness measures in spider monkeys                                                                                                                                                             | zoo              | 1                       | 5                            |
| <i>Ateles geoffroyi</i>      | Burkart et al., 2014           | The evolutionary origin of human hyper-cooperation                                                                                                                                                           | zoo              | 2                       | 23                           |
| <i>Callicebus cupreus</i>    | Bicca-Marques & Garber, 2004   | Use of spatial, visual, and olfactory information during foraging in wild nocturnal and diurnal anthropoids: A field experiment comparing <i>Aotus</i> , <i>Callicebus</i> , and <i>Saguinus</i>             | field            | 1                       | 5                            |
| <i>Callicebus nigrifrons</i> | Cäsar et al., 2013             | Titi monkey call sequences vary with predator location and type                                                                                                                                              | field            | 5                       | NA                           |
| <i>Callicebus nigrifrons</i> | Caselli et al., 2015           | Playback responses of socially monogamous black-fronted titi monkeys to simulated solitary and paired intruders                                                                                              | field            | 5                       | 12                           |
| <i>Callithrix argentata</i>  | Day et al., 2003               | Neophilia, innovation and social learning: A study of intergeneric differences in callitrichid monkeys                                                                                                       | zoo              | 3                       | 22                           |
| <i>Callithrix geoffroyi</i>  | Braccini & Caine, 2009         | Hand preference predicts reactions to novel foods and predators in marmosets ( <i>Callithrix geoffroyi</i> )                                                                                                 | zoo              | 2                       | 18                           |
| <i>Callithrix geoffroyi</i>  | Day et al., 2003               | Neophilia, innovation and social learning: A study of intergeneric differences in callitrichid monkeys                                                                                                       | zoo              | 3                       | 15                           |
| <i>Callithrix geoffroyi</i>  | Kitzmann & Caine, 2009         | Marmoset ( <i>Callithrix geoffroyi</i> ) food-associated calls are functionally referential                                                                                                                  | zoo              | 2                       | 12                           |
| <i>Callithrix geoffroyi</i>  | Petracca & Caine, 2013         | Alarm calls of marmosets ( <i>Callithrix geoffroyi</i> ) to snakes and perched raptors                                                                                                                       | zoo              | 2                       | 12                           |
| <i>Callithrix jacchus</i>    | Burkart & van Schaik, 2013     | Group service in macaques ( <i>Macaca fuscata</i> ), capuchins ( <i>Cebus apella</i> ) and marmosets ( <i>Callithrix jacchus</i> ): A comparative approach to identifying proactive prosocial motivations    | laboratory       | 1                       | 7                            |
| <i>Callithrix jacchus</i>    | Burkart et al., 2014           | The evolutionary origin of human hyper-cooperation                                                                                                                                                           | laboratory       | 5                       | 30                           |
| <i>Callithrix jacchus</i>    | Gunhold et al., 2014           | Memory, transmission and persistence of alternative foraging techniques in wild common marmosets                                                                                                             | field            | 13                      | 111                          |

Table S1. The publications that tested primate cognition in a social setting published between 2000 and 2015 (inclusive), with one entry per unique combination of environment type and species per publication.

| Species                   | Reference                               | Title of Article                                                                                                                                                                                          | Environment Type | Number of Groups Tested | Number of Individuals Tested |
|---------------------------|-----------------------------------------|-----------------------------------------------------------------------------------------------------------------------------------------------------------------------------------------------------------|------------------|-------------------------|------------------------------|
| <i>Callithrix jacchus</i> | Gunhold, Whiten & Bugnyar, 2014         | Video demonstrations seed alternative problem-solving techniques in wild common marmosets                                                                                                                 | field            | 12                      | 109                          |
| <i>Callithrix jacchus</i> | Halsey et al., 2006                     | Can wild common marmosets ( <i>Callithrix jacchus</i> ) solve the parallel strings task?                                                                                                                  | field            | 2                       | 13                           |
| <i>Callithrix jacchus</i> | Pesendorfer et al., 2009                | The maintenance of traditions in marmosets: individual habit, not social conformity? A field experiment                                                                                                   | field            | 9                       | 36                           |
| <i>Callithrix jacchus</i> | Schiel & Huber, 2006                    | Social influences on the development of foraging behavior in free-living common marmosets ( <i>Callithrix jacchus</i> )                                                                                   | field            | 4                       | 32                           |
| <i>Callithrix jacchus</i> | Watson, Buchanan-Smith & Caldwell, 2014 | Call playback artificially generates a temporary cultural style of high affiliation in marmosets                                                                                                          | laboratory       | 19                      | 31                           |
| <i>Cebus apella</i>       | Burkart & van Schaik, 2013              | Group service in macaques ( <i>Macaca fuscata</i> ), capuchins ( <i>Cebus apella</i> ) and marmosets ( <i>Callithrix jacchus</i> ): A comparative approach to identifying proactive prosocial motivations | zoo              | 1                       | 7                            |
| <i>Cebus apella</i>       | Burkart et al., 2014                    | The evolutionary origin of human hyper-cooperation                                                                                                                                                        | laboratory       | 2                       | 17                           |
| <i>Cebus apella</i>       | Burkart et al., 2014                    | The evolutionary origin of human hyper-cooperation                                                                                                                                                        | zoo              | 1                       | 8                            |
| <i>Cebus apella</i>       | Burkart et al., 2014                    | The evolutionary origin of human hyper-cooperation                                                                                                                                                        | laboratory       | 2                       | 17                           |
| <i>Cebus apella</i>       | Burkart et al., 2014                    | The evolutionary origin of human hyper-cooperation                                                                                                                                                        | zoo              | 1                       | 8                            |
| <i>Cebus apella</i>       | Crast, Hardy & Frigaszy, 2010           | Inducing traditions in captive capuchin monkeys ( <i>Cebus apella</i> )                                                                                                                                   | laboratory       | 6                       | 27                           |
| <i>Cebus apella</i>       | Dean et al., 2012                       | Identification of the social and cognitive processes underlying human cumulative culture                                                                                                                  | laboratory       | 1                       | 22                           |
| <i>Cebus apella</i>       | Di Bitetti, 2003                        | Food-associated calls of tufted capuchin monkeys ( <i>Cebus apella nigrinus</i> ) are functionally referential signals                                                                                    | field            | 1                       | NA                           |
| <i>Cebus apella</i>       | Dindo, Whiten & de Waal, 2009           | In-group conformity sustains different foraging traditions in capuchin monkeys ( <i>Cebus apella</i> )                                                                                                    | laboratory       | 2                       | 27                           |
| <i>Cebus apella</i>       | Evans & Westergaard, 2006               | Self-control and tool use in tufted capuchin monkeys ( <i>Cebus apella</i> )                                                                                                                              | laboratory       | 4                       | 20                           |
| <i>Cebus apella</i>       | Flemming, Rattermann & Thompson, 2006   | Differential individual access to and use of reaching tools in social groups of capuchin monkeys ( <i>Cebus apella</i> ) and human infants ( <i>Homo sapiens</i> )                                        | laboratory       | 1                       | 6                            |
| <i>Cebus apella</i>       | Janson, 2007                            | Experimental evidence for route integration and strategic planning in wild capuchin monkeys                                                                                                               | field            | 1                       | 32.5                         |
| <i>Cebus apella</i>       | Morton et al., 2013                     | Taking personality selection bias seriously in animal cognition research: a case study in capuchin monkeys ( <i>Sapajus apella</i> )                                                                      | zoo              | 2                       | 18                           |
| <i>Cebus apella</i>       | Wheeler & Hammerschmidt, 2013           | Proximate factors underpinning receiver responses to deceptive false alarm calls in wild tufted capuchin monkeys: is it counterdeception?                                                                 | field            | NA                      | NA                           |
| <i>Cebus apella</i>       | Wheeler et al., 2014                    | Competition-induced stress does not explain deceptive alarm calling in tufted capuchin monkeys                                                                                                            | field            | 2                       | 45                           |
| <i>Cebus apella</i>       | Wheeler, 2008                           | Selfish or altruistic? An analysis of alarm call function in wild capuchin monkeys, <i>Cebus apella nigrinus</i>                                                                                          | field            | 3                       | 49.5                         |
| <i>Cebus apella</i>       | Wheeler, 2009                           | Monkeys crying wolf? Tufted capuchin monkeys use anti-predator calls to usurp resources from conspecifics                                                                                                 | field            | 1                       | 26                           |

Table S1. The publications that tested primate cognition in a social setting published between 2000 and 2015 (inclusive), with one entry per unique combination of environment type and species per publication.

| Species                        | Reference                         | Title of Article                                                                                                                                                    | Environment Type | Number of Groups Tested | Number of Individuals Tested |
|--------------------------------|-----------------------------------|---------------------------------------------------------------------------------------------------------------------------------------------------------------------|------------------|-------------------------|------------------------------|
| <i>Cebus apella</i>            | Wheeler, 2010                     | Decrease in alarm call response among tufted capuchins in competitive feeding contexts: possible evidence for counterdeception                                      | field            | 1                       | 8                            |
| <i>Cebus apella</i>            | Wheeler, 2010                     | Production and perception of situationally variable alarm calls in wild tufted capuchin monkeys ( <i>Cebus apella nigrinus</i> )                                    | field            | NA                      | NA                           |
| <i>Cebus capucinus</i>         | Meno et al., 2013                 | Development of snake-directed antipredator behavior by wild white-faced capuchin monkeys: II Influence of the social environment                                    | field            | 6                       | 15                           |
| <i>Cebus capucinus</i>         | Meunier, Petit & Deneubourg, 2008 | Social facilitation of fur rubbing behavior in white-faced capuchins                                                                                                | laboratory       | 1                       | 12                           |
| <i>Cebus nigrinus</i>          | Gomes & Bicca-Marques, 2012       | Capuchin monkeys use spatial and visual information during within patch foraging                                                                                    | field            | 1                       | 8                            |
| <i>Cebus olivaceus</i>         | Dubois et al., 2000               | Location-specific responsiveness to environmental perturbations in wedge-capped capuchins ( <i>Cebus olivaceus</i> )                                                | laboratory       | 1                       | 5                            |
| <i>Cebus olivaceus</i>         | Dubois et al., 2001               | Spatial facilitation in a probing task in wedge-capped capuchins ( <i>Cebus olivaceus</i> )                                                                         | laboratory       | 1                       | 4                            |
| <i>Cebus apella</i>            | Addressi & Visalberghi, 2001      | Social facilitation of eating novel food in tufted capuchin monkeys ( <i>Cebus apella</i> ): input provided by group members and responses affected in the observer | laboratory       | 2                       | 15                           |
| <i>Cercocebus torquatus</i>    | Candiotti et al., 2013            | Voice discrimination in four primates                                                                                                                               | laboratory       | 1                       | 6                            |
| <i>Cercopithecus campbelli</i> | Candiotti et al., 2013            | Voice discrimination in four primates                                                                                                                               | laboratory       | 1                       | 8                            |
| <i>Cercopithecus campbelli</i> | Lemasson et al., 2005             | Socially meaningful vocal plasticity in adult Campbell's monkeys ( <i>Cercopithecus campbelli</i> )                                                                 | laboratory       | 1                       | 15                           |
| <i>Cercopithecus campbelli</i> | Ouattara et al., 2009             | The alarm call system of female Campbell's monkeys                                                                                                                  | field            | 7                       | NA                           |
| <i>Cercopithecus campbelli</i> | Zuberbühler, 2001                 | Predator-specific alarm calls in Campbell's monkeys, <i>Cercopithecus campbelli</i>                                                                                 | field            | 55                      | NA                           |
| <i>Cercopithecus diana</i>     | Bshary, 2001                      | Diana monkeys, <i>Cercopithecus diana</i> , adjust their anti-predator response behaviour to human hunting strategies                                               | field            | NA                      | NA                           |
| <i>Cercopithecus diana</i>     | Coye et al., 2015                 | Suffixation influences receivers' behaviour in non-human primates                                                                                                   | field            | 42                      | NA                           |
| <i>Cercopithecus diana</i>     | Stephan & Zuberbühler, 2008       | Predation increases acoustic complexity in primate alarm calls                                                                                                      | field            | NA                      | NA                           |
| <i>Cercopithecus diana</i>     | Stephan & Zuberbühler, 2008       | Predation increases acoustic complexity in primate alarm calls                                                                                                      | field            | NA                      | NA                           |
| <i>Cercopithecus diana</i>     | Stephan & Zuberbühler, 2014       | Predation affects alarm call usage in female Diana monkeys ( <i>Cercopithecus diana diana</i> )                                                                     | field            | NA                      | NA                           |
| <i>Cercopithecus diana</i>     | Stephan & Zuberbühler, 2014       | Predation affects alarm call usage in female Diana monkeys ( <i>Cercopithecus diana diana</i> )                                                                     | field            | NA                      | NA                           |
| <i>Cercopithecus diana</i>     | Zuberbühler, 2000                 | Referential labelling in Diana monkeys                                                                                                                              | field            | 23                      | 23                           |
| <i>Cercopithecus diana</i>     | Zuberbühler, 2000                 | Interspecies semantic communication in two forest primates                                                                                                          | field            | NA                      | NA                           |
| <i>Cercopithecus diana</i>     | Zuberbühler, 2000                 | Causal knowledge of predators' behaviour in wild Diana monkeys                                                                                                      | field            | 50                      | NA                           |

Table S1. The publications that tested primate cognition in a social setting published between 2000 and 2015 (inclusive), with one entry per unique combination of environment type and species per publication.

| Species                        | Reference                             | Title of Article                                                                                                               | Environment Type | Number of Groups Tested | Number of Individuals Tested |
|--------------------------------|---------------------------------------|--------------------------------------------------------------------------------------------------------------------------------|------------------|-------------------------|------------------------------|
| <i>Cercopithecus diana</i>     | Zuberbühler, 2000                     | Causal cognition in a non-human primate: field playback experiments with Diana monkeys                                         | field            | 50                      | NA                           |
| <i>Cercopithecus diana</i>     | Zuberbühler, 2002                     | A syntactic rule in forest monkey communication                                                                                | field            | NA                      | NA                           |
| <i>Cercopithecus mitis</i>     | Murphy et al., 2013                   | Male blue monkey alarm calls encode predator type and distance                                                                 | field            | NA                      | NA                           |
| <i>Cercopithecus mitis</i>     | Papworth et al., 2008                 | Male blue monkeys alarm call in response to danger experienced by others                                                       | field            | 34                      | 34                           |
| <i>Cercopithecus neglectus</i> | Candiotti et al., 2013                | Voice discrimination in four primates                                                                                          | laboratory       | 3                       | 4                            |
| <i>Cercopithecus neglectus</i> | Candiotti et al., 2013                | Voice discrimination in four primates                                                                                          | zoo              | 2                       | 7                            |
| <i>Cercopithecus neglectus</i> | Candiotti et al., 2013                | Voice discrimination in four primates                                                                                          | zoo              | 1                       | 2                            |
| <i>Cercopithecus nictitans</i> | Arnold & Zuberbühler, 2006            | The alarm-calling system of adult male putty-nosed monkeys, <i>Cercopithecus nictitans martini</i>                             | field            | NA                      | NA                           |
| <i>Cercopithecus nictitans</i> | Arnold & Zuberbühler, 2008            | Meaningful call combinations in a non-human primate                                                                            | field            | 1                       | 17                           |
| <i>Cercopithecus nictitans</i> | Arnold & Zuberbühler, 2013            | Female putty-nosed monkeys use experimentally altered contextual information to disambiguate the cause of male alarm calls     | field            | 1                       | NA                           |
| <i>Cercopithecus nictitans</i> | Arnold et al., 2008                   | A forest monkey's alarm call series to predator models                                                                         | field            | NA                      | NA                           |
| <i>Chlorocebus aethiops</i>    | Borgeaud et al., 2015                 | Age/sex differences in third-party rank relationship knowledge in wild vervet monkeys, <i>Chlorocebus aethiops pygerythrus</i> | field            | 3                       | 35                           |
| <i>Chlorocebus aethiops</i>    | Borgeaud, van de Waal & Bshary, 2013  | Third-party ranks knowledge in wild vervet monkeys ( <i>Chlorocebus aethiops pygerythrus</i> )                                 | field            | 3                       | 16                           |
| <i>Chlorocebus aethiops</i>    | James et al., 2007                    | Dimensions of impulsivity are associated with poor spatial working memory performance in monkeys                               | laboratory       | 2                       | 18                           |
| <i>Chlorocebus aethiops</i>    | van de Waal & Bshary, 2011            | Social learning abilities of wild vervet monkeys in a two-step task artificial fruit experiment                                | field            | 6                       | 28                           |
| <i>Chlorocebus aethiops</i>    | van de Waal & Whiten, 2012            | Spontaneous emergence, imitation and spread of alternative foraging techniques among groups of vervet monkeys                  | field            | 4                       | 51                           |
| <i>Chlorocebus aethiops</i>    | van de Waal et al., 2010              | Selective attention to philopatric models causes directed social learning in wild vervet monkeys                               | field            | 6                       | 64                           |
| <i>Chlorocebus aethiops</i>    | van de Waal et al., 2012              | Similarity in food cleaning techniques within matriline in wild vervet monkeys                                                 | field            | 6                       | 63                           |
| <i>Chlorocebus aethiops</i>    | van de Waal et al., 2015              | Wild vervet monkeys copy alternative methods for opening an artificial fruit                                                   | field            | 3                       | 121                          |
| <i>Chlorocebus aethiops</i>    | van de Waal, Borgeaud & Whiten, 2013  | Potent social learning and conformity shape a wild primate's foraging decisions                                                | field            | 4                       | 42                           |
| <i>Chlorocebus aethiops</i>    | van de Waal, Bshary & Whiten, 2014    | Wild vervet monkey infants acquire the food-processing variants of their mothers                                               | field            | 4                       | 17                           |
| <i>Chlorocebus aethiops</i>    | van de Waal, Claidière & Whiten, 2013 | Social learning and spread of alternative means of opening an artificial fruit in four groups of vervet monkeys                | field            | 4                       | 34                           |

Table S1. The publications that tested primate cognition in a social setting published between 2000 and 2015 (inclusive), with one entry per unique combination of environment type and species per publication.

| Species                        | Reference                             | Title of Article                                                                                                                                                              | Environment Type | Number of Groups Tested | Number of Individuals Tested |
|--------------------------------|---------------------------------------|-------------------------------------------------------------------------------------------------------------------------------------------------------------------------------|------------------|-------------------------|------------------------------|
| <i>Chlorocebus aethiops</i>    | van de Waal, Claidière & Whiten, 2014 | Wild vervet monkeys copy alternative methods for opening an artificial fruit                                                                                                  | field            | 3                       | 64                           |
| <i>Chlorocebus pygerythrus</i> | Borgeaud & Bshary, 2015               | Wild vervet monkeys trade tolerance and specific coalitionary support for grooming in experimentally induced conflicts                                                        | field            | 3                       | 17                           |
| <i>Chlorocebus pygerythrus</i> | Burns et al., 2013                    | Barbados green monkeys ( <i>Chlorocebus sabaesus</i> ) recognize ancestral alarm calls after 350 years of isolation                                                           | field            | 1                       | 15                           |
| <i>Chlorocebus pygerythrus</i> | Fruteau, van Damme & Noë, 2013        | Vervet monkeys solve a multiplayer “Forbidden Circle Game” by queuing to learn restraint                                                                                      | field            | 2                       | 14                           |
| <i>Chlorocebus pygerythrus</i> | Noe & Laporte, 2014                   | Socio-spatial cognition in vervet monkeys                                                                                                                                     | field            | 2                       | 26                           |
| <i>Chlorocebus sabaesus</i>    | Price & Fischer, 2014                 | Meaning attribution in the West African green monkey: influence of call type and context                                                                                      | field            | 4                       | 36                           |
| <i>Chlorocebus sabaesus</i>    | Fruteau, van Damme & Noë, 2013        | Vervet monkeys solve a multiplayer “Forbidden Circle Game” by queuing to learn restraint                                                                                      | laboratory       | 1                       | 25                           |
| <i>Colobus guereza</i>         | Candiotti et al., 2013                | Voice discrimination in four primates                                                                                                                                         | zoo              | 1                       | 7                            |
| <i>Colobus guereza</i>         | Price & Caldwell, 2007                | Artificially generated cultural variation between two groups of captive monkeys, <i>Colobus guereza kikuyuensis</i>                                                           | zoo              | 2                       | 4                            |
| <i>Colobus guereza</i>         | Schel et al., 2010                    | Predator-detering alarm call sequences in Guereza colobus monkeys are meaningful to conspecifics                                                                              | field            | NA                      | NA                           |
| <i>Eulemur fulvus</i>          | Fichtel & Hammerschmidt, 2002         | Responses of redfronted lemur to experimentally modified alarm calls: evidence for urgency-based changes in call structure                                                    | field            | 3                       | 9                            |
| <i>Eulemur fulvus</i>          | Fichtel & Kappeler, 2002              | Anti-predator behavior of group-living Malagasy primates: mixed evidence for a referential alarm call system                                                                  | field            | 4                       | 6                            |
| <i>Eulemur fulvus</i>          | Fichtel, 2004                         | Reciprocal recognition of sifaka ( <i>Propithecus verreauxi verreauxi</i> ) and redfronted lemur ( <i>Eulemur fulvus rufus</i> ) alarm calls                                  | field            | 4                       | 8                            |
| <i>Eulemur rufifrons</i>       | Huebner & Fichtel, 2015               | Innovation and behavioral flexibility in wild redfronted lemurs ( <i>Eulemur rufifrons</i> )                                                                                  | field            | 4                       | 29                           |
| <i>Eulemur rufifrons</i>       | Schnoell & Fichtel, 2012              | Wild redfronted lemurs ( <i>Eulemur rufifrons</i> ) use social information to learn new foraging techniques                                                                   | field            | 4                       | 37                           |
| <i>Gorilla gorilla</i>         | Lonsdorf et al., 2009                 | An experimental, comparative investigation of tool use in chimpanzees and gorillas                                                                                            | zoo              | 2                       | 8                            |
| <i>Gorilla gorilla</i>         | Parron et al., 2008                   | Behavioural responses to photographs by pictorially naïve baboons ( <i>Papio anubis</i> ), gorillas ( <i>Gorilla gorilla</i> ) and chimpanzees ( <i>Pan troglodytes</i> )     | zoo              | NA                      | 2                            |
| <i>Gorilla gorilla</i>         | Parron et al., 2008                   | Behavioural responses to photographs by pictorially naïve baboons ( <i>Papio anubis</i> ), gorillas ( <i>Gorilla gorilla</i> ) and chimpanzees ( <i>Pan troglodytes</i> )     | zoo              | NA                      | 2                            |
| <i>Gorilla gorilla</i>         | Pitman & Shumaker, 2009               | Does early care affect joint attention in great apes ( <i>Pan troglodytes</i> , <i>Pan paniscus</i> , <i>Pongo abelii</i> , <i>Pongo pygmaeus</i> , <i>Gorilla gorilla</i> )? | unknown          | NA                      | 7                            |
| <i>Hylobates lar</i>           | Burkart et al., 2014                  | The evolutionary origin of human hyper-cooperation                                                                                                                            | zoo              | 1                       | 3                            |
| <i>Hylobates lar</i>           | Burkart et al., 2014                  | The evolutionary origin of human hyper-cooperation                                                                                                                            | zoo              | 1                       | 3                            |

Table S1. The publications that tested primate cognition in a social setting published between 2000 and 2015 (inclusive), with one entry per unique combination of environment type and species per publication.

| Species                           | Reference                  | Title of Article                                                                                                                                                                                          | Environment Type | Number of Groups Tested | Number of Individuals Tested |
|-----------------------------------|----------------------------|-----------------------------------------------------------------------------------------------------------------------------------------------------------------------------------------------------------|------------------|-------------------------|------------------------------|
| <i>Hylobates syndactylus</i>      | Burkart et al., 2014       | The evolutionary origin of human hyper-cooperation                                                                                                                                                        | zoo              | 1                       | 3                            |
| <i>Hylobates syndactylus</i>      | Burkart et al., 2014       | The evolutionary origin of human hyper-cooperation                                                                                                                                                        | zoo              | 1                       | 3                            |
| <i>Lagothrix poeppigii</i>        | Papworth et al., 2013      | Hunted woolly monkeys ( <i>Lagothrix poeppigii</i> ) show threat-sensitive responses to human presence                                                                                                    | field            | 7                       | 10                           |
| <i>Lemur catta</i>                | Burkart et al., 2014       | The evolutionary origin of human hyper-cooperation                                                                                                                                                        | laboratory       | 1                       | 8                            |
| <i>Lemur catta</i>                | Burkart et al., 2014       | The evolutionary origin of human hyper-cooperation                                                                                                                                                        | laboratory       | 1                       | 8                            |
| <i>Lemur catta</i>                | Kendal et al., 2010        | Evidence for social learning in wild lemurs ( <i>Lemur catta</i> )                                                                                                                                        | field            | 2                       | 28                           |
| <i>Lemur catta</i>                | Kulahci et al., 2015       | Lemurs groom-at-a-distance through vocal networks                                                                                                                                                         | field            | 2                       | 38                           |
| <i>Lemur catta</i>                | Kulahci et al., 2015       | Lemurs groom-at-a-distance through vocal networks                                                                                                                                                         | laboratory       | 2                       | 15                           |
| <i>Lemur catta</i>                | Nunn & Deaner, 2004        | Patterns of participation and free riding in territorial conflicts among ringtailed lemurs ( <i>Lemur catta</i> )                                                                                         | laboratory       | 2                       | 14                           |
| <i>Leontopithecus chrysomelas</i> | Burkart et al., 2014       | The evolutionary origin of human hyper-cooperation                                                                                                                                                        | laboratory       | 1                       | 6                            |
| <i>Leontopithecus chrysomelas</i> | Burkart et al., 2014       | The evolutionary origin of human hyper-cooperation                                                                                                                                                        | laboratory       | 1                       | 6                            |
| <i>Leontopithecus chrysomelas</i> | Day et al., 2003           | Neophilia, innovation and social learning: A study of intergeneric differences in callitrichid monkeys                                                                                                    | zoo              | 3                       | 12                           |
| <i>Leontopithecus chrysomelas</i> | de A Moura et al., 2010    | Food sharing in lion tamarins ( <i>Leontopithecus chrysomelas</i> ): does foraging difficulty affect investment in young by breeders and helpers?                                                         | unknown          | 5                       | 24                           |
| <i>Leontopithecus chrysomelas</i> | Rapaport, 2001             | Food transfer among adult lion tamarins: Mutualism, reciprocity or one-sided relationships?                                                                                                               | zoo              | 1                       | 5                            |
| <i>Leontopithecus chrysopygus</i> | Day et al., 2003           | Neophilia, innovation and social learning: A study of intergeneric differences in callitrichid monkeys                                                                                                    | zoo              | 2                       | 13                           |
| <i>Leontopithecus rosalia</i>     | Day et al., 2003           | Neophilia, innovation and social learning: A study of intergeneric differences in callitrichid monkeys                                                                                                    | zoo              | 3                       | 28                           |
| <i>Leontopithecus rosalia</i>     | Rapaport, 2001             | Food transfer among adult lion tamarins: Mutualism, reciprocity or one-sided relationships?                                                                                                               | zoo              | 4                       | 16                           |
| <i>Lepilemur ruficaudatus</i>     | Fichtel, 2007              | Avoiding predators at night: Antipredator strategies in red-tailed sportive lemurs ( <i>Lepilemur ruficaudatus</i> )                                                                                      | field            | 7                       | 7                            |
| <i>Macaca arctoides</i>           | Paukner & Anderson, 2006   | Video-induced yawning in stump-tail macaques ( <i>Macaca arctoides</i> )                                                                                                                                  | laboratory       | 5                       | 22                           |
| <i>Macaca fascicularis</i>        | Gygax, 2000                | Hiding behaviour of long-tailed macaques ( <i>Macaca fascicularis</i> ): II Use of hiding places during aggressive interactions                                                                           | laboratory       | 1                       | 30                           |
| <i>Macaca fascicularis</i>        | Toxopeus et al., 2005      | Effects of trait anxiety on performance of socially housed monkeys in a learning test                                                                                                                     | laboratory       | 2                       | 15                           |
| <i>Macaca fuscata</i>             | Burkart & van Schaik, 2013 | Group service in macaques ( <i>Macaca fuscata</i> ), capuchins ( <i>Cebus apella</i> ) and marmosets ( <i>Callithrix jacchus</i> ): A comparative approach to identifying proactive prosocial motivations | zoo              | 1                       | 10                           |

Table S1. The publications that tested primate cognition in a social setting published between 2000 and 2015 (inclusive), with one entry per unique combination of environment type and species per publication.

| Species               | Reference                    | Title of Article                                                                                                                                                      | Environment Type | Number of Groups Tested | Number of Individuals Tested |
|-----------------------|------------------------------|-----------------------------------------------------------------------------------------------------------------------------------------------------------------------|------------------|-------------------------|------------------------------|
| <i>Macaca fuscata</i> | Burkart et al., 2014         | The evolutionary origin of human hyper-cooperation                                                                                                                    | zoo              | 1                       | 11                           |
| <i>Macaca fuscata</i> | Burkart et al., 2014         | The evolutionary origin of human hyper-cooperation                                                                                                                    | zoo              | 1                       | 11                           |
| <i>Macaca fuscata</i> | Shizawa et al., 2005         | Playback experiment to test maternal responses of Japanese macaques ( <i>Macaca fuscata</i> ) to their own infant's call when the infants were four to six months old | Laboratory       | 1                       | 12                           |
| <i>Macaca mulatta</i> | Bauman et al., 2006          | The expression of social dominance following neonatal lesions of the amygdala or hippocampus in rhesus monkeys ( <i>Macaca mulatta</i> )                              | laboratory       | 4                       | 24                           |
| <i>Macaca mulatta</i> | Cheries et al., 2006         | Units of visual individuation in rhesus macaques: Objects or unbound features?                                                                                        | field            | NA                      | 207                          |
| <i>Macaca mulatta</i> | Drea, 2006                   | Studying primate learning in group contexts: Tests of social foraging, response to novelty, and cooperative problem solving                                           | laboratory       | 2                       | 55                           |
| <i>Macaca mulatta</i> | Dubuc et al., 2012           | Social tolerance in a despotic primate: Co-feeding between consortship partners in rhesus macaques                                                                    | field            | 1                       | 58                           |
| <i>Macaca mulatta</i> | Flombaum & Santos, 2005      | Rhesus monkeys attribute perceptions to others                                                                                                                        | field            | 8                       | 67                           |
| <i>Macaca mulatta</i> | Flombaum et al., 2004        | Dynamic object individuation in rhesus macaques: A study of the tunnel effect                                                                                         | field            | NA                      | 246                          |
| <i>Macaca mulatta</i> | Fugate et al., 2008          | Recognition of rhesus macaque ( <i>Macaca mulatta</i> ) noisy screams: Evidence from conspecifics and human listeners                                                 | laboratory       | 1                       | 12                           |
| <i>Macaca mulatta</i> | Gazes et al., 2013           | Automated cognitive testing of monkeys in social groups yields results comparable to individual laboratory-based testing                                              | laboratory       | 1                       | 12                           |
| <i>Macaca mulatta</i> | Hauser & Carey, 2003         | Spontaneous representations of small numbers of objects by rhesus macaques: Examinations of content and format                                                        | field            | 7                       | 68                           |
| <i>Macaca mulatta</i> | Hauser, 2007                 | When males call, females listen: sex differences in responsiveness to rhesus monkey, <i>Macaca mulatta</i> , copulation calls                                         | field            | 7.5                     | 58                           |
| <i>Macaca mulatta</i> | Hauser, Carey & Hauser, 2000 | Spontaneous number representation in semi-free-ranging rhesus monkeys                                                                                                 | field            | NA                      | NA                           |
| <i>Macaca mulatta</i> | Henkel et al., 2015          | Rhesus macaques ( <i>Macaca mulatta</i> ) recognize group membership via olfactory cues alone                                                                         | field            | 6                       | 74                           |
| <i>Macaca mulatta</i> | Higham et al., 2011          | Familiarity affects the assessment of female facial signals of fertility by free-ranging male rhesus macaques                                                         | field            | NA                      | 14                           |
| <i>Macaca mulatta</i> | Hughes & Santos, 2012        | Rotational displacement skills in rhesus macaques ( <i>Macaca mulatta</i> )                                                                                           | field            | NA                      | 244.5                        |
| <i>Macaca mulatta</i> | Ioannou et al., 2015         | No strings attached: physiological monitoring of rhesus monkeys ( <i>Macaca mulatta</i> ) with thermal imaging                                                        | sanctuary        | 1                       | 5                            |
| <i>Macaca mulatta</i> | Johnson, 2000                | Food-neophobia in semi-free ranging rhesus macaques: Effects of food limitation and food source                                                                       | laboratory       | 1                       | 278                          |
| <i>Macaca mulatta</i> | Martcorena et al., 2011      | Monkeys represent others' knowledge but not their beliefs                                                                                                             | field            | NA                      | 104.5                        |
| <i>Macaca mulatta</i> | Martin & Santos, 2014        | The origins of belief representation: Monkeys fail to automatically represent others' beliefs                                                                         | field            | NA                      | 335                          |
| <i>Macaca mulatta</i> | Munakata et al., 2001        | Visual representation in the wild: how rhesus monkeys parse objects                                                                                                   | field            | NA                      | 49                           |

Table S1. The publications that tested primate cognition in a social setting published between 2000 and 2015 (inclusive), with one entry per unique combination of environment type and species per publication.

| Species               | Reference                        | Title of Article                                                                                                                             | Environment Type | Number of Groups Tested | Number of Individuals Tested |
|-----------------------|----------------------------------|----------------------------------------------------------------------------------------------------------------------------------------------|------------------|-------------------------|------------------------------|
| <i>Macaca mulatta</i> | Pfefferle et al., 2013           | Female rhesus macaques discriminate unfamiliar paternal sisters in playback experiments: support for acoustic phenotype matching             | field            | 6                       | 72                           |
| <i>Macaca mulatta</i> | Pfefferle et al., 2014           | Monkeys spontaneously discriminate their unfamiliar paternal kin under natural conditions using facial cues                                  | field            | 4                       | 88                           |
| <i>Macaca mulatta</i> | Pfefferle et al., 2015           | Male rhesus macaques use vocalizations to distinguish female maternal, but not paternal, kin from non-kin                                    | field            | 6                       | 52                           |
| <i>Macaca mulatta</i> | Phillips & Santos, 2007          | Evidence for kind representations in the absence of language: Experiments with rhesus monkeys ( <i>Macaca mulatta</i> )                      | field            | NA                      | 126                          |
| <i>Macaca mulatta</i> | Phillips, Shankar & Santos, 2010 | Essentialism in the absence of language? Evidence from rhesus monkeys ( <i>Macaca mulatta</i> )                                              | field            | NA                      | 251.5                        |
| <i>Macaca mulatta</i> | Santos et al., 2002              | Object individuation using property/kind information in rhesus macaques ( <i>Macaca mulatta</i> )                                            | field            | 10                      | 78                           |
| <i>Macaca mulatta</i> | Santos, Hauser & Spelke, 2001    | Recognition and categorization of biologically significant objects by rhesus monkeys ( <i>Macaca mulatta</i> ): The domain of food           | field            | 9                       | 22.5                         |
| <i>Macaca mulatta</i> | Santos, Nissen & Ferrugia, 2006  | Rhesus monkeys ( <i>Macaca mulatta</i> ) know what others can and cannot hear                                                                | field            | NA                      | 90                           |
| <i>Macaca mulatta</i> | Wood et al., 2008                | Free-ranging rhesus monkeys spontaneously individuate and enumerate small numbers of non-solid portions                                      | field            | 6                       | 220                          |
| <i>Macaca nigra</i>   | Micheletta & Waller, 2012        | Friendship affects gaze following in a tolerant species of macaque, <i>Macaca nigra</i>                                                      | zoo              | 1                       | 7                            |
| <i>Macaca nigra</i>   | Micheletta et al., 2012          | Social bonds affect anti-predator behaviour in a tolerant species of macaque, <i>Macaca nigra</i>                                            | field            | 2                       | 10                           |
| <i>Macaca nigra</i>   | Micheletta et al., 2015          | Facial expression recognition in crested macaques ( <i>Macaca nigra</i> )                                                                    | zoo              | 1                       | 3                            |
| <i>Macaca nigra</i>   | Micheletta et al., 2015          | Familiar and unfamiliar face recognition in crested macaques ( <i>Macaca nigra</i> )                                                         | zoo              | 1                       | 3                            |
| <i>Macaca nigra</i>   | Neumann et al., 2013             | Personality of wild male crested macaques ( <i>Macaca nigra</i> )                                                                            | field            | 2                       | 37                           |
| <i>Macaca radiata</i> | Coss et al., 2007                | Threat-related acoustical differences in alarm calls by wild bonnet macaques ( <i>Macaca radiata</i> ) elicited by python and leopard models | field            | 3                       | NA                           |
| <i>Macaca radiata</i> | Coss et al., 2007                | Threat-related acoustical differences in alarm calls by wild bonnet macaques ( <i>Macaca radiata</i> ) elicited by python and leopard models | field            | 1                       | NA                           |
| <i>Macaca radiata</i> | Coss et al., 2007                | Threat-related acoustical differences in alarm calls by wild bonnet macaques ( <i>Macaca radiata</i> ) elicited by python and leopard models | field            | 4                       | NA                           |
| <i>Macaca radiata</i> | Coss et al., 2007                | Threat-related acoustical differences in alarm calls by wild bonnet macaques ( <i>Macaca radiata</i> ) elicited by python and leopard models | field            | 2                       | 8.5                          |
| <i>Macaca radiata</i> | Mangalam & Singh, 2013           | Flexibility in food extraction techniques in urban free-ranging bonnet macaques, <i>Macaca radiata</i>                                       | field            | 2                       | 32                           |
| <i>Macaca radiata</i> | Ramakrishnan & Coss, 2000        | Age differences in the responses to adult and juvenile alarm calls by bonnet macaques ( <i>Macaca radiata</i> )                              | field            | 4                       | NA                           |
| <i>Macaca radiata</i> | Ramakrishnan & Coss, 2000        | Age differences in the responses to adult and juvenile alarm calls by bonnet macaques ( <i>Macaca radiata</i> )                              | field            | 4                       | NA                           |
| <i>Macaca radiata</i> | Ramakrishnan & Coss, 2000        | Age differences in the responses to adult and juvenile alarm calls by bonnet macaques ( <i>Macaca radiata</i> )                              | field            | 3                       | NA                           |



Table S1. The publications that tested primate cognition in a social setting published between 2000 and 2015 (inclusive), with one entry per unique combination of environment type and species per publication.

| Species                  | Reference                     | Title of Article                                                                                                                                                              | Environment Type | Number of Groups Tested | Number of Individuals Tested |
|--------------------------|-------------------------------|-------------------------------------------------------------------------------------------------------------------------------------------------------------------------------|------------------|-------------------------|------------------------------|
| <i>Macaca radiata</i>    | Ramakrishnan et al., 2005     | Snake species discrimination by wild bonnet macaques ( <i>Macaca radiata</i> )                                                                                                | field            | 3                       | NA                           |
| <i>Macaca radiata</i>    | Ramakrishnan et al., 2005     | Snake species discrimination by wild bonnet macaques ( <i>Macaca radiata</i> )                                                                                                | field            | 4                       | NA                           |
| <i>Macaca radiata</i>    | Ramakrishnan et al., 2005     | Snake species discrimination by wild bonnet macaques ( <i>Macaca radiata</i> )                                                                                                | field            | 1                       | NA                           |
| <i>Macaca silenus</i>    | Burkart et al., 2014          | The evolutionary origin of human hyper-cooperation                                                                                                                            | zoo              | 1                       | 6                            |
| <i>Macaca silenus</i>    | Burkart et al., 2014          | The evolutionary origin of human hyper-cooperation                                                                                                                            | zoo              | 1                       | 6                            |
| <i>Macaca sylvanus</i>   | Fischer & Hammerschmidt, 2001 | Functional referents and acoustic similarity revisited: the case of barbary macaque alarm calls                                                                               | zoo              | 3                       | 48-83                        |
| <i>Macaca sylvanus</i>   | Gustison et al., 2012         | An experimental study of behavioural coping strategies in free-ranging female Barbary macaques ( <i>Macaca sylvanus</i> )                                                     | zoo              | 1                       | 12                           |
| <i>Macaca sylvanus</i>   | Pfefferle et al., 2008        | Male Barbary macaques eavesdrop on mating outcome: a playback study                                                                                                           | zoo              | 3                       | 18                           |
| <i>Macaca sylvanus</i>   | Schell et al., 2011           | Adult but not juvenile Barbary macaques spontaneously recognize group members from pictures                                                                                   | zoo              | 3                       | 70                           |
| <i>Macaca sylvanus</i>   | Teufel et al., 2007           | Lack of orienting asymmetries in Barbary macaques: implications for studies of lateralized auditory processing                                                                | zoo              | 3                       | 55                           |
| <i>Mandrillus sphinx</i> | Levréro et al., 2015          | Social shaping of voices does not impair phenotype matching of kinship in mandrills                                                                                           | laboratory       | 3                       | 13                           |
| <i>Pan paniscus</i>      | Bardo et al., 2015            | Do bimanual coordination, tool use, and body posture contribute equally to hand preferences in bonobos?                                                                       | zoo              | 1                       | 9                            |
| <i>Pan paniscus</i>      | Boose, White & Meinelt, 2013  | Sex differences in tool use acquisition in bonobos ( <i>Pan paniscus</i> )                                                                                                    | zoo              | 1                       | 16                           |
| <i>Pan paniscus</i>      | Clay & Zuberbühler, 2011      | Bonobos extract meaning from call sequences                                                                                                                                   | zoo              | 1                       | 4                            |
| <i>Pan paniscus</i>      | Cronin et al., 2015           | Bonobos show limited social tolerance in a group setting: a comparison with chimpanzees and a test of the relational model                                                    | zoo              | 1                       | 9                            |
| <i>Pan paniscus</i>      | Pitman & Shumaker, 2009       | Does early care affect joint attention in great apes ( <i>Pan troglodytes</i> , <i>Pan paniscus</i> , <i>Pongo abelii</i> , <i>Pongo pygmaeus</i> , <i>Gorilla gorilla</i> )? | unknown          | NA                      | 3                            |
| <i>Pan troglodytes</i>   | Bard et al., 2006             | Self-awareness in human and chimpanzee infants: What is measured and what is meant by the mark and mirror test?                                                               | laboratory       | NA                      | 9                            |
| <i>Pan troglodytes</i>   | Bonnie et al., 2007           | Spread of arbitrary conventions among chimpanzees: A controlled experiment                                                                                                    | laboratory       | 2                       | 17                           |
| <i>Pan troglodytes</i>   | Bonnie et al., 2012           | Flexibility and persistence of chimpanzee ( <i>Pan troglodytes</i> ) foraging behavior in a captive environment                                                               | zoo              | 1                       | 7                            |
| <i>Pan troglodytes</i>   | Burkart et al., 2014          | The evolutionary origin of human hyper-cooperation                                                                                                                            | zoo              | 1                       | 29                           |
| <i>Pan troglodytes</i>   | Burkart et al., 2014          | The evolutionary origin of human hyper-cooperation                                                                                                                            | zoo              | 1                       | 29                           |
| <i>Pan troglodytes</i>   | Calcutt et al., 2014          | Captive chimpanzees share diminishing resources                                                                                                                               | zoo              | 1                       | 7                            |

Table S1. The publications that tested primate cognition in a social setting published between 2000 and 2015 (inclusive), with one entry per unique combination of environment type and species per publication.

| Species                | Reference                               | Title of Article                                                                                                                                        | Environment Type | Number of Groups Tested | Number of Individuals Tested |
|------------------------|-----------------------------------------|---------------------------------------------------------------------------------------------------------------------------------------------------------|------------------|-------------------------|------------------------------|
| <i>Pan troglodytes</i> | Clark & Smith, 2013                     | Effect of a cognitive challenge device containing food and non-food rewards on chimpanzee well-being                                                    | zoo              | 1                       | 6                            |
| <i>Pan troglodytes</i> | Crockford et al., 2012                  | Wild chimpanzees inform ignorant group members of danger                                                                                                | field            | 1                       | 33                           |
| <i>Pan troglodytes</i> | Crockford et al., 2015                  | An intentional vocalization draws others' attention: A playback experiment with wild chimpanzees                                                        | field            | NA                      | 12                           |
| <i>Pan troglodytes</i> | Cronin et al., 2014a                    | Population-level variability in the social climates of four chimpanzee societies                                                                        | sanctuary        | 4                       | 91                           |
| <i>Pan troglodytes</i> | Dean et al., 2012                       | Identification of the social and cognitive processes underlying human cumulative culture                                                                | laboratory       | 8                       | 74                           |
| <i>Pan troglodytes</i> | Finestone et al., 2014                  | The interplay between individual, social, and environmental influences on chimpanzee food choices                                                       | zoo              | 1                       | 6                            |
| <i>Pan troglodytes</i> | Herbinger et al., 2009                  | Vocal, gestural, and locomotor responses of wild chimpanzees to familiar and unfamiliar intruders: A playback study                                     | field            | 3                       | 84                           |
| <i>Pan troglodytes</i> | Hopkins et al., 2013                    | Are chimpanzees really so poor at understanding imperative pointing? Some new data and an alternative view of canine and ape social cognition           | laboratory       | NA                      | 18                           |
| <i>Pan troglodytes</i> | Hopper et al., 2007                     | Experimental studies of traditions and underlying transmission processes in chimpanzees                                                                 | laboratory       | 2                       | 16                           |
| <i>Pan troglodytes</i> | Hopper et al., 2011                     | Chimpanzees' socially maintained food preferences indicate both conservatism and conformity                                                             | laboratory       | 2                       | 12                           |
| <i>Pan troglodytes</i> | Hopper et al., 2015                     | The importance of witnessed agency in chimpanzee social learning of tool use                                                                            | laboratory       | 4                       | 19                           |
| <i>Pan troglodytes</i> | Hopper et al., 2015                     | Captive chimpanzee foraging in a social setting: a test of problem solving, flexibility, and spatial discounting                                        | zoo              | 1                       | 6                            |
| <i>Pan troglodytes</i> | Hopper et al., 2015                     | Chimpanzees create and modify probe tools functionally: A study with zoo-housed chimpanzees                                                             | zoo              | 1                       | 7                            |
| <i>Pan troglodytes</i> | Horner et al., 2010                     | Prestige affects cultural learning in chimpanzees                                                                                                       | laboratory       | 2                       | 14                           |
| <i>Pan troglodytes</i> | hou et al., 2007                        | Now you see me, now you don't: evidence that chimpanzees understand the role of the eyes in attention                                                   | laboratory       | NA                      | 116                          |
| <i>Pan troglodytes</i> | House et al., 2014                      | Task design influences prosociality in captive chimpanzees ( <i>Pan troglodytes</i> )                                                                   | laboratory       | 5                       | 18                           |
| <i>Pan troglodytes</i> | Hrubesch, Preuschoft & van Schaik, 2009 | Skill mastery inhibits adoption of observed alternative solutions among chimpanzees ( <i>Pan troglodytes</i> )                                          | sanctuary        | 2                       | 13                           |
| <i>Pan troglodytes</i> | Huffman & Hirata, 2004                  | An experimental study of leaf swallowing in captive chimpanzees: insights into the origin of a self-medicative behavior and the role of social learning | laboratory       | 1                       | 6                            |
| <i>Pan troglodytes</i> | Huffman et al., 2010                    | Leaf swallowing behavior in chimpanzees ( <i>Pan troglodytes</i> ): biased learning and the emergence of group level cultural differences               | zoo              | 2                       | 11                           |
| <i>Pan troglodytes</i> | Kendal et al., 2015                     | Chimpanzees copy dominant and knowledgeable individuals: implications for cultural diversity                                                            | laboratory       | 4                       | 42                           |
| <i>Pan troglodytes</i> | Kutsukake et al., 2012                  | Individual variation in behavioural reactions to unfamiliar conspecific vocalisation and hormonal underpinnings in male chimpanzees                     | sanctuary        | 2                       | 14                           |
| <i>Pan troglodytes</i> | Leavens et al., 2010                    | Multimodal communication by captive chimpanzees ( <i>Pan troglodytes</i> )                                                                              | laboratory       | NA                      | 55                           |

Table S1. The publications that tested primate cognition in a social setting published between 2000 and 2015 (inclusive), with one entry per unique combination of environment type and species per publication.

| Species                | Reference                              | Title of Article                                                                                                                                                              | Environment Type | Number of Groups Tested | Number of Individuals Tested |
|------------------------|----------------------------------------|-------------------------------------------------------------------------------------------------------------------------------------------------------------------------------|------------------|-------------------------|------------------------------|
| <i>Pan troglodytes</i> | Lonsdorf et al., 2009                  | An experimental, comparative investigation of tool use in chimpanzees and gorillas                                                                                            | zoo              | 1                       | 7                            |
| <i>Pan troglodytes</i> | Massen et al., 2012                    | Male yawning is more contagious than female yawning among chimpanzees ( <i>Pan troglodytes</i> )                                                                              | zoo              | 1                       | 15                           |
| <i>Pan troglodytes</i> | Massen et al., 2013                    | A behavioral view on chimpanzee personality: exploration tendency, persistence, boldness, and tool-orientation measured with group experiments                                | zoo              | 1                       | 16                           |
| <i>Pan troglodytes</i> | Massen et al., 2013                    | A behavioral view on chimpanzee personality: exploration tendency, persistence, boldness, and tool-orientation measured with group experiments                                | zoo              | 1                       | 15                           |
| <i>Pan troglodytes</i> | Morimura & Mori, 2010                  | Effects of early rearing conditions on problem-solving skill in captive male chimpanzees ( <i>Pan troglodytes</i> )                                                           | sanctuary        | 2                       | 13                           |
| <i>Pan troglodytes</i> | Parron et al., 2008                    | Behavioural responses to photographs by pictorially naïve baboons ( <i>Papio anubis</i> ), gorillas ( <i>Gorilla gorilla</i> ) and chimpanzees ( <i>Pan troglodytes</i> )     | zoo              | NA                      | 3.5                          |
| <i>Pan troglodytes</i> | Pitman & Shumaker, 2009                | Does early care affect joint attention in great apes ( <i>Pan troglodytes</i> , <i>Pan paniscus</i> , <i>Pongo abelii</i> , <i>Pongo pygmaeus</i> , <i>Gorilla gorilla</i> )? | unknown          | NA                      | 7                            |
| <i>Pan troglodytes</i> | Rawlings, Davila-Ross & Boysen, 2014   | Semi-wild chimpanzees open hard-shelled fruits differently across communities                                                                                                 | sanctuary        | 3                       | 56                           |
| <i>Pan troglodytes</i> | Russell et al., 2005                   | Chimpanzee ( <i>Pan troglodytes</i> ) intentional communication is not contingent upon food                                                                                   | laboratory       | NA                      | 46                           |
| <i>Pan troglodytes</i> | Russell et al., 2005                   | Chimpanzee ( <i>Pan troglodytes</i> ) intentional communication is not contingent upon food                                                                                   | laboratory       | NA                      | 13                           |
| <i>Pan troglodytes</i> | Schel et al., 2013                     | Chimpanzee alarm call production meets key criteria for intentionality                                                                                                        | field            | 1                       | 7                            |
| <i>Pan troglodytes</i> | Schel et al., 2013                     | Chimpanzee food calls are directed at specific individuals                                                                                                                    | field            | 1                       | 69                           |
| <i>Pan troglodytes</i> | Schneider, Melis & Tomasello, 2012     | How chimpanzees solve collective action problems                                                                                                                              | zoo              | 2                       | 12                           |
| <i>Pan troglodytes</i> | Slocombe & Zuberbühler, 2005           | Functionally referential communication in a chimpanzee                                                                                                                        | zoo              | 1                       | 1                            |
| <i>Pan troglodytes</i> | Slocombe, Townsend & Zuberbühler, 2009 | Wild chimpanzees ( <i>Pan troglodytes schweinfurthii</i> ) distinguish between different scream types: evidence from a playback study                                         | field            | 1                       | 6                            |
| <i>Pan troglodytes</i> | Suchak et al., 2014                    | Ape duos and trios: spontaneous cooperation with free partner choice in chimpanzees                                                                                           | laboratory       | 1                       | 11                           |
| <i>Pan troglodytes</i> | Ushitani, Imura & Tomonaga, 2010       | Object-based attention in chimpanzees ( <i>Pan troglodytes</i> )                                                                                                              | laboratory       | 1                       | 2                            |
| <i>Pan troglodytes</i> | van Leeuwen et al., 2013               | Chimpanzees ( <i>Pan troglodytes</i> ) flexibly adjust their behaviour in order to maximize payoffs, not to conform to majorities                                             | zoo              | 1                       | 16                           |
| <i>Pan troglodytes</i> | van Leeuwen et al., 2013               | Chimpanzees ( <i>Pan troglodytes</i> ) flexibly adjust their behaviour in order to maximize payoffs, not to conform to majorities                                             | sanctuary        | 1                       | 12                           |
| <i>Pan troglodytes</i> | Whiten et al., 2007                    | Transmission of multiple traditions within and between chimpanzee groups                                                                                                      | laboratory       | 6                       | 56                           |
| <i>Pan troglodytes</i> | Whiten, Horner & De Waal, 2005         | Conformity to cultural norms of tool use in chimpanzees                                                                                                                       | laboratory       | 3                       | 39                           |

Table S1. The publications that tested primate cognition in a social setting published between 2000 and 2015 (inclusive), with one entry per unique combination of environment type and species per publication.

| Species                   | Reference                         | Title of Article                                                                                                                                                          | Environment Type | Number of Groups Tested | Number of Individuals Tested |
|---------------------------|-----------------------------------|---------------------------------------------------------------------------------------------------------------------------------------------------------------------------|------------------|-------------------------|------------------------------|
| <i>Pan troglodytes</i>    | Wilson, Hauser & Wrangham, 2001   | Does participation in intergroup conflict depend on numerical assessment, range location, or rank for wild chimpanzees?                                                   | field            | 28                      | 50                           |
| <i>Pan troglodytes</i>    | Wittig et al., 2014               | Triadic social interactions operate across time: a field experiment with wild chimpanzees                                                                                 | field            | 1                       | 16                           |
| <i>Papio anubis</i>       | Laidre, 2008                      | Spontaneous performance of wild baboons on three novel food-access puzzles                                                                                                | field            | 1                       | 25                           |
| <i>Papio anubis</i>       | Meunier, Prieur & Vauclair, 2013  | Olive baboons communicate intentionally by pointing                                                                                                                       | laboratory       | 9                       | 9                            |
| <i>Papio anubis</i>       | Parron et al., 2008               | Behavioural responses to photographs by pictorially naïve baboons ( <i>Papio anubis</i> ), gorillas ( <i>Gorilla gorilla</i> ) and chimpanzees ( <i>Pan troglodytes</i> ) | laboratory       | NA                      | 27.5                         |
| <i>Papio cynocephalus</i> | Fischer, Cheney & Seyfarth, 2000  | Development of infant baboons' responses to grade bark variants                                                                                                           | field            | 1                       | 17                           |
| <i>Papio cynocephalus</i> | Kitchen et al., 2003              | Female baboons' responses to male loud calls                                                                                                                              | field            | 1                       | 12                           |
| <i>Papio hamadryas</i>    | Crockford et al., 2007            | Baboons eavesdrop to deduce mating opportunities                                                                                                                          | field            | 1                       | 9                            |
| <i>Papio hamadryas</i>    | Kitchen et al., 2005              | Male chacma baboons ( <i>Papio hamadryas ursinus</i> ) discriminate loud call contests between rivals of different relative ranks                                         | field            | 1                       | 10                           |
| <i>Papio hamadryas</i>    | Kitchen et al., 2013              | Male baboon responses to experimental manipulations of loud "wahoo calls": testing an honest signal of fighting ability                                                   | field            | 1                       | 8                            |
| <i>Papio hamadryas</i>    | Lemasson, Palombit, & Jubin, 2008 | Friendship between males and lactating females in a free-ranging group of olive baboons ( <i>Papio hamadryas anubis</i> ): evidence from playback experiments             | field            | 1                       | 105                          |
| <i>Papio hamadryas</i>    | Pearson et al., 2015              | Crowding increases salivary cortisol but not self-directed behavior in captive baboons                                                                                    | laboratory       | 1                       | 19                           |
| <i>Papio hamadryas</i>    | Wittig et al., 2007               | Kin-mediated reconciliation substitutes for direct reconciliation in female baboons                                                                                       | field            | 1                       | 13                           |
| <i>Papio hamadryas</i>    | Wittig et al., 2007               | Vocal alliances in chacma baboons ( <i>Papio hamadryas ursinus</i> )                                                                                                      | field            | 1                       | 13                           |
| <i>Papio papio</i>        | Barbet & Fagot, 2011              | Processing of contour closure by baboons ( <i>Papio papio</i> )                                                                                                           | laboratory       | 4                       | 19                           |
| <i>Papio papio</i>        | Bonté, Flemming & Fagot, 2011     | Executive control of perceptual features and abstract relations by baboons ( <i>Papio papio</i> )                                                                         | laboratory       | 1                       | 24                           |
| <i>Papio papio</i>        | Claidière et al., 2014            | Cultural evolution of systematically structured behaviour in a non-human primate                                                                                          | laboratory       | 1                       | 15                           |
| <i>Papio papio</i>        | Claidière et al., 2015            | Using Automated Learning Devices for Monkeys (ALDM) to study social networks                                                                                              | laboratory       | 1                       | 22                           |
| <i>Papio papio</i>        | Fagot & Bonté, 2010               | Automated testing of cognitive performance in monkeys: Use of a battery of computerized test systems by a troop of semi-free-ranging baboons ( <i>Papio papio</i> )       | laboratory       | 1                       | 20                           |
| <i>Papio papio</i>        | Fagot & De Lillo, 2011            | A comparative study of working memory: Immediate serial spatial recall in baboons ( <i>Papio papio</i> ) and humans                                                       | laboratory       | 1                       | 2                            |
| <i>Papio papio</i>        | Fagot & Maugard, 2013             | Analogical reasoning in baboons ( <i>Papio papio</i> ): flexible reencoding of the source relation depending on the target relation                                       | laboratory       | 1                       | 4                            |

Table S1. The publications that tested primate cognition in a social setting published between 2000 and 2015 (inclusive), with one entry per unique combination of environment type and species per publication.

| Species                  | Reference                        | Title of Article                                                                                                                                                              | Environment Type | Number of Groups Tested | Number of Individuals Tested |
|--------------------------|----------------------------------|-------------------------------------------------------------------------------------------------------------------------------------------------------------------------------|------------------|-------------------------|------------------------------|
| <i>Papio papio</i>       | Fagot & Paleressompoulle, 2009   | Automatic testing of cognitive performance in baboons maintained in social groups                                                                                             | laboratory       | 3                       | 9                            |
| <i>Papio papio</i>       | Fagot & Parron, 2010             | Relational matching in baboons ( <i>Papio papio</i> ) with reduced grouping requirements                                                                                      | laboratory       | 3                       | 6                            |
| <i>Papio papio</i>       | Fagot et al., 2013               | Age-Dependant Behavioral Strategies in a Visual Search Task in Baboons ( <i>Papio papio</i> ) and Their Relation to Inhibitory Control                                        | laboratory       | 1                       | 18                           |
| <i>Papio papio</i>       | Fagot et al., 2014               | Effects of freely accessible computerized test systems on the spontaneous behaviors and stress level of Guinea baboons ( <i>Papio papio</i> )                                 | laboratory       | 2                       | 9                            |
| <i>Papio papio</i>       | Flemming, Thompson & Fagot, 2013 | Baboons, like humans, solve analogy by categorical abstraction of relations                                                                                                   | laboratory       | 1                       | 8                            |
| <i>Papio papio</i>       | Goujon & Fagot, 2013             | Learning of spatial statistics in nonhuman primates: contextual cueing in baboons ( <i>Papio papio</i> )                                                                      | laboratory       | 1                       | 25                           |
| <i>Papio papio</i>       | Huguet et al., 2014              | Cognitive control under social influence in baboons                                                                                                                           | laboratory       | NA                      | 11                           |
| <i>Papio papio</i>       | Maciej et al., 2013              | Social monitoring in a multilevel society: a playback study with male Guinea baboons                                                                                          | field            | 2                       | 12                           |
| <i>Papio papio</i>       | Marzouki et al., 2014            | Baboons' response speed is biased by their moods                                                                                                                              | laboratory       | 2                       | 6                            |
| <i>Papio papio</i>       | Maugard, Marzouki & Fagot, 2013  | Contribution of working memory processes to relational matching-to-sample performance in baboons ( <i>Papio Papio</i> )                                                       | laboratory       | 1                       | 10                           |
| <i>Papio papio</i>       | Parron & Fagot, 2010             | First- and second-order configural sensitivity for greeble stimuli in baboons                                                                                                 | laboratory       | 1                       | 3                            |
| <i>Papio papio</i>       | Pope et al., 2015                | Baboons ( <i>Papio papio</i> ), but not humans, break cognitive set in a visuomotor task                                                                                      | laboratory       | 1                       | 15                           |
| <i>Papio ursinus</i>     | Bergman & Kitchen, 2009          | Comparing responses to novel objects in wild baboons ( <i>Papio ursinus</i> ) and geladas ( <i>Theropithecus gelada</i> )                                                     | field            | 1                       | 78                           |
| <i>Papio ursinus</i>     | Carter et al., 2012              | How not to measure boldness: novel object and antipredator responses are not the same in wild baboons                                                                         | field            | 2                       | 57                           |
| <i>Papio ursinus</i>     | Carter et al., 2014              | Personality predicts the propensity for social learning in a wild primate                                                                                                     | field            | 2                       | 55                           |
| <i>Papio ursinus</i>     | Noser & Byrne, 2015              | Wild chacma baboons ( <i>Papio ursinus</i> ) remember single foraging episodes                                                                                                | field            | 1                       | 24                           |
| <i>Pithecia pithecia</i> | Burkart et al., 2014             | The evolutionary origin of human hyper-cooperation                                                                                                                            | zoo              | 1                       | 5                            |
| <i>Pongo abelii</i>      | Forss et al., 2015               | Contrasting responses to novelty by wild and captive orangutans                                                                                                               | field            | NA                      | 28                           |
| <i>Pongo abelii</i>      | Forss et al., 2015               | Contrasting responses to novelty by wild and captive orangutans                                                                                                               | zoo              | 1                       | 7                            |
| <i>Pongo abelii</i>      | Pitman & Shumaker, 2009          | Does early care affect joint attention in great apes ( <i>Pan troglodytes</i> , <i>Pan paniscus</i> , <i>Pongo abelii</i> , <i>Pongo pygmaeus</i> , <i>Gorilla gorilla</i> )? | unknown          | NA                      | NA                           |
| <i>Pongo abelii</i>      | Scheumann & Call, 2006           | Sumatran orangutans and a yellow-cheeked crested gibbon know what is where                                                                                                    | zoo              | 1                       | 6                            |
| <i>Pongo pygmaeus</i>    | Forss et al., 2015               | Contrasting responses to novelty by wild and captive orangutans                                                                                                               | field            | NA                      | 28                           |

Table S1. The publications that tested primate cognition in a social setting published between 2000 and 2015 (inclusive), with one entry per unique combination of environment type and species per publication.

| Species                                              | Reference                      | Title of Article                                                                                                                                                                                 | Environment Type | Number of Groups Tested | Number of Individuals Tested |
|------------------------------------------------------|--------------------------------|--------------------------------------------------------------------------------------------------------------------------------------------------------------------------------------------------|------------------|-------------------------|------------------------------|
| <i>Pongo pygmaeus</i>                                | Lehner et al., 2011            | Can captive orangutans ( <i>Pongo pygmaeus abelii</i> ) be coaxed into cumulative build-up of techniques?                                                                                        | zoo              | 1                       | 7                            |
| <i>Pongo pygmaeus</i>                                | Pitman & Shumaker, 2009        | Does early care affect joint attention in great apes ( <i>Pan troglodytes</i> , <i>Pan paniscus</i> , <i>Pongo abelii</i> , <i>Pongo pygmaeus</i> , <i>Gorilla gorilla</i> )?                    | unknown          | NA                      | NA                           |
| <i>Presbytis thomasi</i>                             | Wich & de Vries, 2006          | Male monkeys remember which group members have given alarm calls                                                                                                                                 | field            | 12                      | 12                           |
| <i>Presbytis thomasi</i>                             | Wich & Sterck, 2003            | Possible audience effect in Thomas langurs (primates; <i>Presbytis thomasi</i> ): An experimental study on male loud calls in response to a tiger model                                          | field            | 12                      | 12                           |
| <i>Presbytis thomasi</i>                             | Wich et al., 2002              | Playbacks of loud calls to wild Thomas langurs (Primates; <i>Presbytis thomasi</i> ): the effect of location                                                                                     | field            | 12                      | NA                           |
| <i>Presbytis thomasi</i>                             | Wich et al., 2004              | Thomas langurs ( <i>Presbytis thomasi</i> ) discriminate between calls of young solitary versus older group-living males: a factor in avoiding infanticide?                                      | field            | 10                      | NA                           |
| <i>Propithecus verreauxi</i>                         | Fichtel & Kappeler, 2002       | Anti-predator behavior of group-living Malagasy primates: mixed evidence for a referential alarm call system                                                                                     | field            | 4                       | 6                            |
| <i>Propithecus verreauxi</i>                         | Fichtel, 2005                  | Reciprocal recognition of sifaka ( <i>Propithecus verreauxi verreauxi</i> ) and redfronted lemur ( <i>Eulemur fulvus rufus</i> ) alarm calls                                                     | field            | 4                       | 8                            |
| <i>Propithecus verreauxi</i>                         | Fichtel, 2008                  | Ontogeny of conspecific and heterospecific alarm call recognition in wild verreaux's sifakas ( <i>Propithecus verreauxi verreauxi</i> )                                                          | field            | 12                      | 19                           |
| <i>Rhinopithecus roxellana</i>                       | Fu et al., 2013                | Free-ranging Sichuan snub-nosed monkeys <i>Rhinopithecus roxellana</i> : Neophobia, neophilia, or both?                                                                                          | field            | 1                       | 24                           |
| <i>Saguinus fuscicollis</i>                          | Bicca-Marques & Garber, 2004   | Use of spatial, visual, and olfactory information during foraging in wild nocturnal and diurnal anthropoids: A field experiment comparing <i>Aotus</i> , <i>Callicebus</i> , and <i>Saguinus</i> | field            | 2                       | 9                            |
| <i>Saguinus fuscicollis</i>                          | Bradley & McClung, 2015        | Vocal divergence and discrimination of long calls in tamarins: a comparison of allopatric populations of <i>Saguinus fuscicollis nigrifrons</i> and <i>S. f. lagonotus</i>                       | field            | 5                       | NA                           |
| <i>Saguinus fuscicollis</i>                          | Hardie & Buchanan-Smith, 2000  | Responses of captive single- and mixed-species groups of <i>Saguinus</i> to novel nonthreatening objects                                                                                         | zoo              | 7                       | 25                           |
| <i>Saguinus fuscicollis</i> & <i>Saguinas mystax</i> | Kirchhof & Hammerschmidt, 2006 | Functionally referential alarm calls in tamarins ( <i>Saguinus fuscicollis</i> and <i>S. mystax</i> ) - evidence from playback experiments                                                       | field            | 3                       | 21                           |
| <i>Saguinus imperator</i>                            | Bicca-Marques & Garber, 2004   | Use of spatial, visual, and olfactory information during foraging in wild nocturnal and diurnal anthropoids: A field experiment comparing <i>Aotus</i> , <i>Callicebus</i> , and <i>Saguinus</i> | field            | 2                       | 10                           |
| <i>Saguinus imperator</i>                            | Day et al., 2003               | Neophilia, innovation and social learning: A study of intergeneric differences in callitrichid monkeys                                                                                           | zoo              | 3                       | 9                            |
| <i>Saguinus labiatus</i>                             | Hardie & Buchanan-Smith, 2000  | Responses of captive single- and mixed-species groups of <i>Saguinus</i> to novel nonthreatening objects                                                                                         | zoo              | 6                       | 21                           |
| <i>Saguinus oedipus</i>                              | Burkart et al., 2014           | The evolutionary origin of human hyper-cooperation                                                                                                                                               | laboratory       | 1                       | 5                            |
| <i>Saguinus oedipus</i>                              | Campbell & Snowdon, 2009       | Can auditory playback condition predator mobbing in captive-reared <i>Saguinus oedipus</i> ?                                                                                                     | laboratory       | 1                       | 6                            |
| <i>Saguinus oedipus</i>                              | Day et al., 2003               | Neophilia, innovation and social learning: A study of intergeneric differences in callitrichid monkeys                                                                                           | zoo              | 1                       | 4                            |

Table S1. The publications that tested primate cognition in a social setting published between 2000 and 2015 (inclusive), with one entry per unique combination of environment type and species per publication.

| Species                     | Reference                       | Title of Article                                                                                                               | Environment Type | Number of Groups Tested | Number of Individuals Tested |
|-----------------------------|---------------------------------|--------------------------------------------------------------------------------------------------------------------------------|------------------|-------------------------|------------------------------|
| <i>Saguinus oedipus</i>     | Matthews & Snowdon, 2011        | Long-term memory for calls of relatives in cotton-top tamarins ( <i>Saguinus oedipus</i> )                                     | laboratory       | NA                      | 22                           |
| <i>Saguinus oedipus</i>     | Roush & Snowdon, 2000           | Quality, quantity, distribution and audience effects on food calling in cotton-top tamarins                                    | laboratory       | 7                       | NA                           |
| <i>Saguinus oedipus</i>     | Snowdon & Boe, 2003             | Social communication about unpalatable foods in tamarins ( <i>Saguinus oedipus</i> )                                           | laboratory       | 8                       | 44                           |
| <i>Saguinus oedipus</i>     | Zahed et al., 2008              | Male parenting and response to infant stimuli in the common marmoset ( <i>Callithrix jacchus</i> )                             | laboratory       | 15                      | 15                           |
| <i>Saimiri boliviensis</i>  | Hopper et al., 2013             | Dissecting the mechanisms of squirrel monkey ( <i>Saimiri boliviensis</i> ) social learning                                    | laboratory       | 3                       | 34                           |
| <i>Saimiri sciureus</i>     | Burkart et al., 2014            | The evolutionary origin of human hyper-cooperation                                                                             | zoo              | 1                       | 19                           |
| <i>Saimiri sciureus</i>     | Claidière et al., 2013          | Diffusion dynamics of socially learned foraging techniques in squirrel monkeys                                                 | zoo              | 2                       | 27                           |
| <i>Saimiri sciureus</i>     | McCowan & Newman, 2000          | The role of learning in chuck call recognition by squirrel monkeys ( <i>Saimiri sciureus</i> )                                 | laboratory       | 3                       | 17                           |
| <i>Saimiri sciureus</i>     | Soltis et al., 2002             | Squirrel monkey chuck call: vocal response to playback chucks on acoustic structure and affiliative relationship with caller   | laboratory       | 2                       | 10                           |
| <i>Sapajus libidinosus</i>  | Fragaszy et al., 2013           | Wild bearded capuchin monkeys ( <i>Sapajus libidinosus</i> ) strategically place nuts in a stable position during nut-cracking | field            | 1                       | 10                           |
| <i>Sapajus libidinosus</i>  | Howard et al., 2015             | Landscape influences on the natural and artificially manipulated movements of bearded capuchin monkeys                         | field            | 1                       | 8                            |
| <i>Simias concolor</i>      | Yorzinski & Ziegler, 2007       | Do naïve primates recognize the vocalizations of felid predators?                                                              | field            | NA                      | 88                           |
| <i>Theropithecus gelada</i> | Bergman & Kitchen, 2009         | Comparing responses to novel objects in wild baboons ( <i>Papio ursinus</i> ) and geladas ( <i>Theropithecus gelada</i> )      | field            | 3                       | 79                           |
| <i>Theropithecus gelada</i> | Bergman, 2010                   | Experimental evidence for limited vocal recognition in a wild primate: implications for the social complexity hypothesis       | field            | 4                       | 18                           |
| <i>Theropithecus gelada</i> | le Roux & Bergman, 2012         | Indirect rival assessment in a social primate, <i>Theropithecus gelada</i>                                                     | field            | NA                      | 35                           |
| <i>Varecia variegata</i>    | Burkart et al., 2014            | The evolutionary origin of human hyper-cooperation                                                                             | laboratory       | 1                       | 6                            |
| <i>Varecia variegata</i>    | Stoinski, Drayton & Price, 2011 | Evidence of social learning in black-and-white ruffed lemurs ( <i>Varecia variegata</i> )                                      | zoo              | 1                       | 8                            |
